# Supplementary material for: Post-Migration Changes in Dietary Patterns and Physical Activity among Adult Foreign Residents in Niigata Prefecture, Japan: A Mixed-Methods Study
Source: MDPI journal article supplement (doi:10.3390/nu15163639), 2023-08-19
Supplement: s1 [file s1]

Table S1.1: Participant representation from each country<sup>1</sup>

|                             | Survey (N=128) | Interview (N=21) |
|-----------------------------|----------------|------------------|
| South America               |                |                  |
| Brazil                      | 1 (0.8)        | 0                |
| Chile                       | 1 (0.8)        | 1 (5.0)          |
| Colombia                    | 1 (0.8)        | 0                |
| Peru                        | 2 (1.6)        | 1 (5.0)          |
| North America and Caribbean |                |                  |
| USA                         | 6 (4.7)        | 2 (10.0)         |
| Mexico                      | 2 (1.6)        | 1 (5.0)          |
| Jamaica                     | 1 (0.8)        | 0                |
| Africa                      |                |                  |
| Benin                       | 1 (0.8)        | 0                |
| Côte d'Ivoire               | 1 (0.8)        | 1 (5.0)          |
| Malawi                      | 2 (1.6)        | 0                |
| Mauritius                   | 1 (0.8)        | 1 (5.0)          |
| Mozambique                  | 3 (2.3)        | 0                |
| Namibia                     | 1 (0.8)        | 0                |
| Nigeria                     | 1 (0.8)        | 0                |
| Rwanda                      | 1 (0.8)        | 0                |
| Tanzania                    | 1 (0.8)        | 0                |
| South Asia                  |                |                  |
| Bangladesh                  | 2 (1.6)        | 0                |
| India                       | 3 (2.3)        | 1 (5.0)          |
| Nepal                       | 4 (3.1)        | 0                |
| Sri Lanka                   | 11 (8.6)       | 2 (10.0)         |
| Southeast and East Asia     |                |                  |
| Indonesia                   | 10 (7.8)       | 2 (5.0)          |
| Laos                        | 1 (0.8)        | 0                |
| Malaysia                    | 3 (2.3)        | 0                |
| Myanmar                     | 6 (4.7)        | 1 (5.0)          |
| Philippines                 | 8 (6.3)        | 1 (5.0)          |
| Thailand                    | 6 (4.7)        | 0                |
| Vietnam                     | 5 (3.9)        | 1 (5.0)          |
| China                       | 9 (7.0)        | 1 (5.0)          |
| South Korea                 | 3 (2.3)        | 0                |
| Mongolia                    | 3 (2.3)        | 0                |
| Taiwan                      | 5 (3.9)        | 0                |
| Central Asia and Russia     |                |                  |
| Kazakhstan                  | 2 (1.6)        | 2 (10.0)         |
| Russia                      | 12 (9.4)       | 2 (10.0)         |
| Middle East and Turkey      |                |                  |
| Egypt                       | 1 (0.8)        | 0                |
| Jordan                      | 1 (0.8)        | 0                |
| Turkey                      | 4 (3.1)        | 1 (5.0)          |
| Australia                   | 3 (2.3)        | 0                |

<sup>1</sup> Data presented as *n* (%).

Table S1.2: Associations between dietary habits and frequency of traditional food consumption<sup>1</sup>

|                    | More than 4 times/<br>week (N=49) | Less than 4 times/<br>week (N=79) |
|--------------------|-----------------------------------|-----------------------------------|
| Vegan              | 1 (2.0)                           | 3 (3.8)                           |
| Vegetarian         | 3 (6.1)                           | 5 (6.3)                           |
| Halal              | 6 (12.2)                          | 9 (11.4)                          |
| No beef            | 8 (16.3)                          | 2 (2.5) <sup>a</sup>              |
| No pork            | 9 (18.4)                          | 8 (10.1)                          |
| No any meat        | 1 (2.0)                           | 0                                 |
| Nothing particular | 30 (61.2)                         | 63 (79.7) <sup>b</sup>            |

<sup>1</sup>Data presented as *n* (% within the frequency); <sup>a</sup>  $\chi^2$  (1, N=128) = 7.991, *p* = 0.007; <sup>a</sup>  $\chi^2$  (1, N=128) = 5.222, *p* = 0.022

Table S1.3: Self-reported changes in consumption of foods/ food groups (N=128)<sup>1</sup>

|                           | Eat much<br>less | No<br>significant<br>change | Eat much<br>more | Don't eat<br>at all | Total<br>change  |
|---------------------------|------------------|-----------------------------|------------------|---------------------|------------------|
| Staple foods              |                  |                             |                  |                     |                  |
| Rice                      | 19 (14.8)        | 55 (43.0)                   | 54 (42.2)        | 0                   | <b>73 (57.0)</b> |
| Bread and bakery products | 24 (18.8)        | 53 (41.4)                   | 51 (39.8)        | 0                   | <b>75 (58.6)</b> |
| Ready-to-eat-cereals      | 35 (27.3)        | 27 (21.1)                   | 26 (20.3)        | 40 (31.3)           | 62 (47.6)        |
| Spaghetti/ pasta          | 26 (20.3)        | 50 (39.1)                   | 46 (35.9)        | 6 (4.7)             | <b>72 (57.2)</b> |
| Noodle                    | 11 (8.6)         | 38 (29.7)                   | <b>74 (57.8)</b> | 5 (3.9)             | <b>85 (66.4)</b> |
| Naan/ tortilla            | 20 (15.6)        | 32 (25.0)                   | 45 (35.2)        | 31 (24.2)           | <b>65 (50.8)</b> |
| Pizza                     | 30 (23.4)        | 53 (41.4)                   | 32 (25.0)        | 13 (10.2)           | 62 (48.4)        |
| Pancake/ waffles          | 34 (26.6)        | 40 (31.3)                   | 20 (15.6)        | 34 (26.6)           | 54 (42.2)        |
| Legumes                   |                  |                             |                  |                     |                  |
| Fresh beans/ peas         | 31 (24.2)        | 44 (34.4)                   | 34 (26.6)        | 19 (14.8)           | <b>65 (50.8)</b> |
| Dried beans/ peas         | 34 (26.6)        | 48 (37.5)                   | 17 (13.3)        | 29 (22.7)           | 51 (40.0)        |
| Tofu                      | 5 (3.9)          | 41 (32.0)                   | 59 (46.1)        | 23 (18.0)           | <b>64 (50.0)</b> |
| Vegetables and fruits     |                  |                             |                  |                     |                  |
| Potatoes                  | 30 (23.4)        | 62 (48.4)                   | 32 (25.0)        | 4 (3.1)             | 62 (48.4)        |
| Sweet potatoes            | 23 (18.0)        | 34 (26.6)                   | 44 (34.4)        | 27 (21.1)           | <b>67 (52.3)</b> |
| Yams                      | 28 (21.9)        | 36 (28.1)                   | 18 (14.1)        | 46 (35.9)           | 47 (36.0)        |
| Vegetables                | 34 (26.6)        | 47 (36.7)                   | 45 (35.2)        | 2 (1.6)             | <b>79 (61.7)</b> |
| Green leaves              | 42 (32.8)        | 50 (39.1)                   | 31 (24.2)        | 5 (3.9)             | <b>73 (57.0)</b> |
| Pickled vegetables        | 24 (18.8)        | 41 (32.0)                   | 39 (30.5)        | 24 (18.8)           | 63 (49.2)        |
| Fruits                    | <b>64 (50.0)</b> | 34 (26.6)                   | 27 (21.1)        | 3 (2.3)             | <b>91 (71.1)</b> |
| Mushrooms                 | 14 (10.9)        | 46 (35.9)                   | 60 (46.9)        | 8 (6.3)             | <b>74 (57.8)</b> |
| Animal foods              |                  |                             |                  |                     |                  |
| Chicken                   | 10 (7.8)         | 56 (43.8)                   | 60 (46.9)        | 2 (1.6)             | <b>70 (54.7)</b> |
| Pork                      | 22 (17.2)        | 40 (31.3)                   | 41 (32.0)        | 25 (19.5)           | 63 (49.2)        |
| Beef                      | 58 (45.3)        | 28 (21.9)                   | 28 (21.9)        | 14 (10.9)           | <b>86 (67.2)</b> |
| Sausage                   | 32 (25.0)        | 45 (35.2)                   | 24 (18.8)        | 27 (21.1)           | 56 (43.8)        |
| Ham                       | 28 (21.9)        | 39 (30.5)                   | 21 (16.4)        | 40 (31.3)           | 49 (38.3)        |
| Bacon                     | 25 (19.5)        | 42 (32.8)                   | 18 (14.1)        | 43 (33.6)           | 43 (33.6)        |
| Eggs                      | 6 (4.7)          | 67 (52.3)                   | 54 (42.2)        | 1 (0.8)             | 60 (46.9)        |
| Seafoods                  |                  |                             |                  |                     |                  |

|                     |           |           |                   |           |                   |
|---------------------|-----------|-----------|-------------------|-----------|-------------------|
| Raw fish            | 10 (7.8)  | 15 (11.7) | <b>86 (67.2)</b>  | 17 (13.3) | <b>96 (75.0)</b>  |
| Cooked/ baked fish  | 22 (17.2) | 40 (31.3) | 58 (45.3)         | 8 (6.3)   | <b>80 (62.5)</b>  |
| Sea weed            | 10 (7.8)  | 26 (20.3) | <b>77 (60.2)</b>  | 15 (11.7) | <b>87 (68.0)</b>  |
| Sea food            | 20 (15.6) | 28 (21.9) | <b>72 (56.3)</b>  | 8 (6.3)   | <b>92 (71.9)</b>  |
| Dairy foods         |           |           |                   |           |                   |
| Milk                | 24 (18.8) | 68 (53.1) | 26 (20.3)         | 10 (7.8)  | 50 (39.1)         |
| Yoghurt             | 33 (25.8) | 59 (46.1) | 30 (23.4)         | 6 (4.7)   | 63 (49.2)         |
| Cheese              | 34 (26.6) | 58 (45.3) | 31 (24.2)         | 5 (3.9)   | <b>65 (50.8)</b>  |
| Butter              | 37 (28.9) | 69 (53.9) | 15 (11.7)         | 7 (5.5)   | 52 (40.6)         |
| Sweets and snacks   |           |           |                   |           |                   |
| Pies/ Cakes         | 46 (35.9) | 47 (36.7) | 32 (25.0)         | 3 (2.3)   | <b>78 (60.9)</b>  |
| Chocolates          | 25 (19.5) | 59 (46.1) | 41 (32.0)         | 3 (2.3)   | <b>66 (51.5)</b>  |
| Candy               | 35 (27.3) | 65 (50.8) | 12 (9.4)          | 16 (12.5) | 47 (36.7)         |
| Ice-cream           | 22 (17.2) | 63 (49.2) | 36 (28.1)         | 7 (5.5)   | 58 (45.3)         |
| Salty snacks        | 30 (23.4) | 53 (41.4) | 40 (31.3)         | 5 (3.9)   | <b>70 (54.7)</b>  |
| Beverages           |           |           |                   |           |                   |
| Coffee              | 8 (6.3)   | 51 (39.8) | 50 (39.1)         | 19 (14.8) | 58 (45.3)         |
| Green tea           | 10 (7.8)  | 36 (28.1) | <b>75 (58.6)</b>  | 7 (5.5)   | <b>85 (66.4)</b>  |
| Other tea types     | 20 (15.6) | 60 (46.9) | 35 (27.3)         | 13 (10.2) | 55 (42.9)         |
| Fruit Juice         | 47 (36.7) | 44 (34.4) | 26 (20.3)         | 11 (8.6)  | <b>73 (57.0)</b>  |
| Soft drinks         | 21 (16.4) | 63 (49.2) | 31 (24.2)         | 13 (10.2) | 52 (40.6)         |
| Soup/ porridge      | 35 (27.3) | 59 (46.1) | 27 (21.1)         | 7 (5.5)   | 62 (48.4)         |
| Sport/ energy drink | 6 (4.7)   | 41 (32.0) | 27 (21.1)         | 54 (42.2) | 33 (25.8)         |
| Alcohol             | 11 (8.6)  | 45 (35.2) | 33 (25.8)         | 39 (30.5) | 44 (34.4)         |
| Seasoning           |           |           |                   |           |                   |
| Salad dressing      | 11 (8.6)  | 51 (39.8) | 63 (49.2)         | 3 (2.3)   | <b>74 (57.8)</b>  |
| Soy sauce           | 13 (10.2) | 38 (29.7) | <b>76 (59.4)</b>  | 1 (0.8)   | <b>89 (69.6)</b>  |
| Miso                | 9 (7.0)   | 13 (10.2) | <b>100 (78.1)</b> | 6 (4.7)   | <b>109 (85.1)</b> |
| Ketch-up            | 23 (18.0) | 57 (44.5) | 30 (23.4)         | 18 (14.1) | 53 (41.4)         |
| Mayonnaise          | 15 (11.7) | 54 (42.2) | 50 (39.1)         | 9 (7.0)   | <b>65 (50.8)</b>  |
| Sauce mix           | 21 (16.4) | 47 (36.7) | 45 (35.2)         | 15 (11.7) | <b>66 (51.6)</b>  |

<sup>1</sup>Data presented as *n* (%).

Bold numbers indicate ≥50% of total change.

Table S1.4: Associations between post-migration fruit consumption and monthly income<sup>1</sup>

| Fruit intake          | Monthly income |                    |                    |           |                                                             |
|-----------------------|----------------|--------------------|--------------------|-----------|-------------------------------------------------------------|
|                       | <100,000¥      | 100,000 – 200,000¥ | 200,000 – 300,000¥ | >300,000¥ |                                                             |
| Eat much less         | 12 (63.2)      | 41 (53.9)          | 6 (30.0)           | 5 (38.5)  | $\chi^2$ (1, N=128)<br>= 25.467,<br><p><i>p</i> = 0.002</p> |
| No significant change | 3 (15.8)       | 14 (18.4)          | 10 (50.0)          | 7 (53.8)  |                                                             |
| Eat much more         | 2 (10.5)       | 21 (27.6)          | 3 (15.0)           | 1 (7.7)   |                                                             |
| Don't eat at all      | 2 (10.5)       | 0                  | 1 (5.0)            | 0         |                                                             |

<sup>1</sup> Data presented as *n* (% within monthly income).

Table S1.5: Self-reported changes in food preparation methods and dietary behaviors (N=128)<sup>1</sup>

|                               | Less often/<br>Decreased | Almost<br>same | More<br>often/<br>Increased | Not at all | Total<br>change  |
|-------------------------------|--------------------------|----------------|-----------------------------|------------|------------------|
| Preparation methods           |                          |                |                             |            |                  |
| Stir-frying                   | 12 (9.4)                 | 70 (54.7)      | 40 (31.3)                   | 6 (4.7)    | 52 (40.7)        |
| Deep frying                   | 35 (27.3)                | 45 (35.2)      | 30 (23.4)                   | 18 (14.1)  | <b>65 (50.8)</b> |
| BBQ                           | 46 (35.9)                | 31 (24.2)      | 25 (19.5)                   | 26 (20.3)  | <b>71 (55.5)</b> |
| Grilling                      | 43 (33.6)                | 33 (25.8)      | 29 (22.7)                   | 23 (18.0)  | <b>72 (56.3)</b> |
| Baking                        | 38 (29.7)                | 32 (25.0)      | 13 (10.2)                   | 45 (35.2)  | 51 (39.8)        |
| Microwaving                   | 6 (4.7)                  | 28 (21.9)      | <b>85 (66.4)</b>            | 9 (7.0)    | <b>91 (71.1)</b> |
| Stewing                       | 17 (13.3)                | 66 (51.6)      | 31 (24.2)                   | 14 (10.9)  | 48 (37.5)        |
| Dietary behaviors             |                          |                |                             |            |                  |
| Homemade meals                | 35 (27.3)                | 43 (33.6)      | 50 (39.1)                   | 0          | <b>85 (66.4)</b> |
| Restaurant meals/ dine-out    | 37 (28.9)                | 33 (25.8)      | 54 (42.2)                   | 4 (3.1)    | <b>91 (71.1)</b> |
| Takeout                       | 45 (35.2)                | 25 (19.5)      | 47 (36.7)                   | 11 (8.6)   | <b>92 (71.9)</b> |
| Home delivery                 | 53 (41.4)                | 16 (12.5)      | 13 (10.2)                   | 46 (35.9)  | <b>67 (51.6)</b> |
| Buffet                        | 35 (27.3)                | 31 (24.2)      | 44 (34.4)                   | 18 (14.1)  | <b>79 (61.7)</b> |
| Skipping breakfast            | 16 (12.5)                | 30 (23.4)      | 53 (41.4)                   | 29 (22.7)  | <b>69 (53.9)</b> |
| Skipping lunch/ dinner        | 15 (11.7)                | 44 (34.4)      | 33 (25.8)                   | 36 (28.1)  | 48 (37.5)        |
| Late night meals              | 17 (13.3)                | 24 (18.8)      | 58 (45.3)                   | 29 (22.7)  | <b>75 (58.6)</b> |
| Meal frequency                | 23 (18.0)                | 80 (62.5)      | 23 (18.0)                   | 2 (1.6)    | 46 (36.0)        |
| Fasting/ Intermittent fasting | 19 (14.8)                | 39 (30.5)      | 23 (18.0)                   | 47 (36.7)  | 42 (32.8)        |
| Snacking between meals        | 21 (16.4)                | 61 (47.7)      | 36 (28.1)                   | 10 (7.8)   | 57 (44.5)        |
| Canned foods                  | 30 (23.4)                | 48 (37.5)      | 32 (25.0)                   | 18 (14.1)  | 62 (48.4)        |
| Frozen foods                  | 18 (14.1)                | 32 (25.0)      | <b>69 (53.9)</b>            | 9 (7.0)    | <b>87 (68.0)</b> |
| Organic foods                 | 48 (37.5)                | 52 (40.6)      | 18 (14.1)                   | 10 (7.8)   | <b>68 (51.6)</b> |

<sup>1</sup> Data presented as n (%).

Bold numbers indicate ≥50% of total change.

Table S1.6: Increased use of frozen foods and microwaving by region and residence status<sup>1</sup>

|                             | Frozen foods (N=69) | Microwaving (N=85) |
|-----------------------------|---------------------|--------------------|
| Region                      |                     |                    |
| South America               | 2 (40.0)            | 4 (80.0)           |
| North America and Caribbean | 2 (22.2)            | 4 (44.4)           |
| Africa                      | 7 (58.3)            | 8 (66.7)           |
| South Asia                  | 13 (65.0)           | 17 (85.0)          |
| Southeast Asia              | 28 (71.8)           | 32 (82.1)          |
| East Asia                   | 8 (40.0)            | 9 (45.0)           |
| Central Asia and Russia     | 3 (21.4)            | 4 (28.6)           |
| Middle East and Turkey      | 6 (100.0)           | 6 (100.0)          |
| Australia                   | 0                   | 1 (33.3)           |
| Residence status            |                     |                    |

|                                      |           |           |
|--------------------------------------|-----------|-----------|
| Vocational/ technical school student | 2 (66.7)  | 3 (100.0) |
| University student                   | 53 (64.6) | 62 (75.6) |
| Employment                           | 8 (28.6)  | 10 (35.7) |
| Dependent                            | 2 (25.0)  | 5 (62.5)  |
| Permanent resident                   | 4 (57.1)  | 5 (71.4)  |

<sup>1</sup>Data presented as *n* (% within region or residence status)

Table S1.7: Associations between the availability of traditional food ingredients and frequency of traditional food consumption<sup>1</sup>

| Availability<br>Frequency | Available | No/ limited<br>availability |                                                          |
|---------------------------|-----------|-----------------------------|----------------------------------------------------------|
| More than 4 times/ week   | 30 (61.2) | 19 (38.8)                   | $\chi^2$ (1, <i>N</i> =128) = 4.001,<br><i>p</i> = 0.045 |
| Less than 4 times/ week   | 34 (43.0) | 45 (57.0)                   |                                                          |

<sup>1</sup> Data presented as *n* (% within frequency).

Table S1.8: Post-migration changes in Noodle consumption by region<sup>1</sup>

|                             | Eat much less<br>( <i>N</i> =11) | No significant<br>change ( <i>N</i> =38) | Eat much<br>more<br>( <i>N</i> =74) | Eat much<br>less ( <i>N</i> =5) |
|-----------------------------|----------------------------------|------------------------------------------|-------------------------------------|---------------------------------|
| South America               | 0                                | 0                                        | <b>5 (100.0)</b>                    | 0                               |
| North America and Caribbean | 0                                | 0                                        | <b>9 (100.0)</b>                    | 0                               |
| Africa                      | 2 (16.7)                         | 1 (8.3)                                  | 8 (66.7)                            | 1 (8.3)                         |
| South Asia                  | 4 (20.0)                         | 1 (10.0)                                 | 14 (70.0)                           | 0                               |
| Southeast Asia              | 3 (7.7)                          | 13 (33.3)                                | 20 (51.3)                           | 3 (7.7)                         |
| East Asia                   | 1(5.0)                           | 14 (70.0)                                | 5 (25.0)                            | 0                               |
| Central Asia and Russia     | 1 (7.1)                          | 4 (28.6)                                 | 9 (64.3)                            | 0                               |
| Middle East and Turkey      | 0                                | 4 (66.7)                                 | 2 (33.3)                            | 0                               |
| Australia                   | 0                                | 0                                        | 2 (66.7)                            | 1 (33.3)                        |

<sup>1</sup>Data presented as *n* (%).

Bold numbers indicate ≥50% of increased consumption within the region.

Table S1.9: Post-migration changes in Green tea consumption by region<sup>1</sup>

|                             | Eat much less<br>( <i>N</i> =10) | No significant<br>change ( <i>N</i> =36) | Eat much<br>more<br>( <i>N</i> =75) | Eat much<br>less ( <i>N</i> =7) |
|-----------------------------|----------------------------------|------------------------------------------|-------------------------------------|---------------------------------|
| South America               | 0                                | 3 (60.0)                                 | 2 (40.0)                            | 0                               |
| North America and Caribbean | 0                                | 2 (22.2)                                 | 4 (44.4)                            | 3 (33.3)                        |
| Africa                      | 2 (16.7)                         | 5 (41.7)                                 | 5 (41.7)                            | 0                               |
| South Asia                  | 3 (15.0)                         | 1 (5.0)                                  | <b>15 (75.0)</b>                    | 1 (5.0)                         |
| Southeast Asia              | 1 (2.6)                          | 8 (20.5)                                 | <b>28 (71.8)</b>                    | 2 (5.1)                         |
| East Asia                   | 1(5.0)                           | 9 (45.0)                                 | 10 (50.0)                           | 0                               |
| Central Asia and Russia     | 1 (7.1)                          | 6 (42.9)                                 | 7 (50.0)                            | 0                               |
| Middle East and Turkey      | 2 (33.3)                         | 1 (16.7)                                 | 2 (33.3)                            | 1 (16.7)                        |
| Australia                   | 0                                | 1 (33.3)                                 | 2 (66.7)                            | 0                               |

<sup>1</sup>Data presented as *n* (%).

Bold numbers indicate ≥50% of increased consumption within the region.
