# Supplementary material for: Post-Migration Changes in Dietary Patterns and Physical Activity among Adult Foreign Residents in Niigata Prefecture, Japan: A Mixed-Methods Study
Source: MDPI journal article supplement (doi:10.3390/nu15163639), 2023-08-19
Supplement: s1 [file s1]

**Figure S1: Thematic Map: Environmental factors influencing post-migration dietary changes**

| Factors                                                 | Why?                                                                                                                                                                                                                                                                                                                                                                                                        | How?                                                                                                                                                                                                                                                                                                                                                                                                                                                                                                                                                                                          | Associated factors                       |
|---------------------------------------------------------|-------------------------------------------------------------------------------------------------------------------------------------------------------------------------------------------------------------------------------------------------------------------------------------------------------------------------------------------------------------------------------------------------------------|-----------------------------------------------------------------------------------------------------------------------------------------------------------------------------------------------------------------------------------------------------------------------------------------------------------------------------------------------------------------------------------------------------------------------------------------------------------------------------------------------------------------------------------------------------------------------------------------------|------------------------------------------|
| Affordability of foods and ingredients                  | <ol style="list-style-type: none"> <li>1. Higher prices of some foods and ingredients</li> <li>2. Considerably lower prices of Japanese local foods</li> <li>3. Cost of eating outside</li> </ol>                                                                                                                                                                                                           | <ol style="list-style-type: none"> <li>1. Opt for cheaper foods</li> <li>2. Buying smaller quantities</li> <li>3. Purchase only when the prices are lower</li> <li>4. Start to prepare own meals</li> </ol>                                                                                                                                                                                                                                                                                                                                                                                   | Duration of stay<br>Employment status    |
| Availability and accessibility of foods and ingredients | <ol style="list-style-type: none"> <li>1. Less/ non-availability of foods and ingredients</li> <li>2. Difficulty to procure in the same quantities or qualities as in the home country</li> <li>3. Limited number of foreign food restaurants</li> <li>4. Challenges in accessing traditional foods and ingredients</li> <li>5. Wide availability and easy accessibility to Japanese local foods</li> </ol> | <ol style="list-style-type: none"> <li>1. Use of substitute ingredients for unavailable traditional ingredients</li> <li>2. Fusion of Japanese and traditional cuisines</li> <li>3. Ignoring the non-availability of ingredients that do not affect the flavour of traditional dishes significantly</li> <li>4. Giving up the preparation of some traditional dishes</li> <li>4. Driving to other cities where international stores are available</li> <li>5. Ordering online</li> <li>6. Acquiring the skills to prepare and cook traditional/ international dishes independently</li> </ol> | Duration of stay<br>Language proficiency |
| Food safety and related information                     | <ol style="list-style-type: none"> <li>1. Perceived safety/ unsafety about foods and ingredients in Japan</li> <li>2. Lack of food-related information or knowledge</li> </ol>                                                                                                                                                                                                                              | <ol style="list-style-type: none"> <li>1. Buying food without the fear of expiration or cleanliness</li> <li>2. Reluctant to buy products without detailed information</li> <li>3. Not preparing foods that are unavailable in the home country without related information on preparation methods</li> </ol>                                                                                                                                                                                                                                                                                 |                                          |
| Climate                                                 | Cold weather in Niigata                                                                                                                                                                                                                                                                                                                                                                                     | Changes in food intake and preparation methods                                                                                                                                                                                                                                                                                                                                                                                                                                                                                                                                                |                                          |

**Figure S2: Thematic Map: Individual factors influencing post-migration dietary changes**

| Factors                                  | Why?                                                                                                                                                                                                                                                                                                      | How?                                                                                                                                                                                                                                                                                                                                                                                                                                                                                                                              |
|------------------------------------------|-----------------------------------------------------------------------------------------------------------------------------------------------------------------------------------------------------------------------------------------------------------------------------------------------------------|-----------------------------------------------------------------------------------------------------------------------------------------------------------------------------------------------------------------------------------------------------------------------------------------------------------------------------------------------------------------------------------------------------------------------------------------------------------------------------------------------------------------------------------|
| Family structure/ living status in Japan | <ol style="list-style-type: none"> <li>1. The burden of preparing complicated or time-consuming meals for one person</li> <li>2. Japanese-foreign households</li> <li>3. The newfound responsibility of procuring and preparing foods</li> <li>4. Changes in meal-associated family traditions</li> </ol> | <ol style="list-style-type: none"> <li>1. Opt for simple and non-complicated meals</li> <li>2. Bi-cultural meal patterns (traditional cuisines of the foreign resident, and Japanese cuisines)</li> <li>3. Start to procure and prepare own food</li> <li>4. Not following meal-associated practices that enjoyed with the family at the home country such as tea time</li> </ol>                                                                                                                                                 |
| Food preferences and limitations         | <ol style="list-style-type: none"> <li>1. Preference for traditional foods/ tastes</li> <li>2. Newfound preference for Japanese foods/ tastes</li> <li>3. Willingness to try new foods</li> <li>4. Ingrained habits and beliefs</li> <li>5. Health-related factors</li> </ol>                             | <ol style="list-style-type: none"> <li>1. Avoiding Japanese products with flavors different from traditional products</li> <li>2. Choosing foods with similar tastes or qualities to traditional foods</li> <li>3. Increased intake of Japanese food associated with newfound preference for Japanese foods/ tastes, health related factors</li> <li>4. Limited intake of Japanese foods due to taste preferences, health-related factors or ingrained beliefs</li> <li>5. Fusion of Japanese and traditional cuisines</li> </ol> |
| Post-migration lifestyle                 | <ol style="list-style-type: none"> <li>1. Time restrictions and busy lifestyle</li> <li>2. Contrast between pre- and post-migration lifestyles</li> </ol>                                                                                                                                                 | <ol style="list-style-type: none"> <li>1. Opting for simple foods that do not require much preparation time</li> <li>2. Bulk food preparation and storing</li> <li>3. Choosing foods that do not spoil quickly</li> <li>4. Fusion of traditional and Japanese cuisines</li> <li>5. Missing meals (breakfast)</li> <li>6. Start to prepare and procure own food</li> </ol>                                                                                                                                                         |

Figure S3: Thematic Map: Socio-cultural factors Influencing post-migration dietary changes

| Factors                                                | Why?                                                                                                                                                                                                                                                              | How?                                                                                                                                                                                                                                                                                                  | Associated factors   |
|--------------------------------------------------------|-------------------------------------------------------------------------------------------------------------------------------------------------------------------------------------------------------------------------------------------------------------------|-------------------------------------------------------------------------------------------------------------------------------------------------------------------------------------------------------------------------------------------------------------------------------------------------------|----------------------|
| Contrast between traditional and Japanese food culture | <div>1. Influence of the characteristic features of Japanese food culture</div> <div>2. Positive effects of Japanese food culture</div> <div>3. Problems encountered with Japanese food culture</div> <div>4. Notions regarding the Japanese (food) culture</div> | <div>1. Incorporating characteristic features of Japanese food culture into their diet</div> <div>2. Eating healthier/ unhealthier than in the home country</div> <div>3. Frequent meals</div> <div>4. Pre-migration changes in the diet in preparation for adapting to Japanese (food) culture</div> |                      |
| Relationships with Japanese people                     | <div>1. Broadened view of Japanese traditional food culture</div> <div>2. The effect of COVID-19 pandemic</div>                                                                                                                                                   | <div>1. Experience and learn about authentic tastes, ingredients, preparation methods</div> <div>2. Limited opportunities to eat together</div>                                                                                                                                                       | Language proficiency |
| Religious influence                                    | Religion-associated food restrictions                                                                                                                                                                                                                             | <div>1. Checking the ingredients of foods before purchasing</div> <div>2. Preparing own meals</div> <div>3. Limit eating out</div>                                                                                                                                                                    |                      |

Figure S4: Thematic Map: Factors influencing post-migration PA changes

| Factors                  | Why?                                                                                                                                                | How?                                                                                                                                                                               |
|--------------------------|-----------------------------------------------------------------------------------------------------------------------------------------------------|------------------------------------------------------------------------------------------------------------------------------------------------------------------------------------|
| Climate                  | <ol style="list-style-type: none"><li>1. Cold winter and heavy snowfall in Niigata</li></ol>                                                        | <ol style="list-style-type: none"><li>1. Reduced outdoor PA (going out, cardio workouts) in winter</li><li>2. Opt for indoor PA (ex: weight-lifting, push-ups) in winter</li></ol> |
| Post-migration lifestyle | <ol style="list-style-type: none"><li>1. Changes in social life compared to the home country</li><li>2. Changes in work environment</li></ol>       | <ol style="list-style-type: none"><li>1. Going out less often than in home country</li><li>2. Sedentary lifestyle associated with the type of work</li></ol>                       |
| Japanese culture         | <ol style="list-style-type: none"><li>1. Health-conscious lifestyle in Japan</li><li>2. Perceived safety</li><li>3. Small apartment rooms</li></ol> | <ol style="list-style-type: none"><li>1. Engage in PA (riding bicycles, jogging)</li><li>2. Going out even at night</li><li>3. Limited movements inside the home</li></ol>         |
